# Supplementary material
Source: PubMed Central journal article supplement (PMC4135642)
Supplement: JB.01782-14_zjb999093267so1.pdf [file JB.01782-14_zjb999093267so1.pdf]

**Table S1. Strain, plasmid, and oligonucleotide list**

|                                    | Description                                                                                                                | Reference  |
|------------------------------------|----------------------------------------------------------------------------------------------------------------------------|------------|
| <b>Strains</b>                     |                                                                                                                            |            |
| P90C                               | F- <i>ara</i> $\Delta$ ( <i>lac-pro</i> ) <sub>XII</sub> <i>thi</i>                                                        | (1)        |
| $\Delta$ <i>dinB</i>               | As P90C but with $\Delta$ <i>dinB</i> ::Kan                                                                                | (2)        |
| RWB1581                            | As P90C but <i>dnaE915</i> <i>zae</i> -502::Tn10 <i>zae</i> ::Tn10dcam from SMR6114 (3) replacing <i>dnaE</i> <sup>+</sup> | This work  |
| RWB2028                            | As RWB1581 but with $\Delta$ <i>dinB</i> :: <i>frt</i>                                                                     | This work. |
| RWB2031                            | As $\Delta$ <i>dinB</i> but with $\Delta$ <i>attB</i> :: <i>sulAp</i> -GFP and <i>gal76</i> ::Tn10 from SS1465 (4)         | This work  |
| RWB2132                            | As RWB2028 but with $\Delta$ <i>attB</i> :: <i>sulAp</i> -GFP and <i>gal76</i> ::Tn10 from SS1465 (4)                      | This work  |
| RWB2370                            | As RWB2028 but with ( $\Delta$ TL5) $\Delta$ <i>polB</i> ::Kan and $\Delta$ <i>umuDC</i> :: <i>cat</i>                     | This work  |
| RWB2436                            | As RWB1581 but with <i>dinB</i> (D103N) (5) replacing <i>dinB</i> <sup>+</sup>                                             | This work  |
| RWB2184                            | As RWB2132 but with $\Delta$ <i>recA</i> ::Kan                                                                             | This work  |
| RWB3374                            | As RWB2436 but with $\Delta$ <i>umuDC</i> :: <i>cat</i> .                                                                  | This work  |
| RWB3404                            | As RWB3374 but with $\Delta$ <i>dinB</i> ::Kan                                                                             | This work  |
| RWB3401                            | As RWB2028 but with $\Delta$ <i>polB</i> ::Kan                                                                             | This work  |
| MG1655                             | Wild type <i>Escherichia coli</i>                                                                                          | (6)        |
| RWB169                             | As MG1655 but with <i>dnaE915</i> and $\Delta$ <i>dinB</i> ::Kan alleles                                                   | This work  |
| BL21-AI $\Delta$ <i>dinB</i>       | BL21-AI $\Delta$ <i>dinB</i> ::Kan                                                                                         | (7)        |
| <b>Plasmids</b>                    |                                                                                                                            |            |
| pWSK29                             | pSC101 replicon with pBluescript II SK <sup>+</sup> multiple cloning site, Amp <sup>R</sup>                                | (8)        |
| pYG768                             | pWSK29 with <i>dinB</i> <sup>+</sup> under its native promoter                                                             | (9)        |
| pYG768(D103N)                      | As pYG768 but with <i>dinB</i> (D103N)                                                                                     | (10)       |
| pYG768 $\Delta$ $\beta$            | As pYG768 but with <i>dinB</i> <sup>+</sup> $\Delta$ $\beta$                                                               | Lab Stock  |
| pYG768(D103N) $\Delta$ $\beta$     | As pYG768 but with <i>dinB</i> (D103N) $\Delta$ $\beta$                                                                    | (2)        |
| pYG768(V288G)                      | As pYG768 but with <i>dinB</i> (V288G)                                                                                     | This work  |
| pYG768(F292Y)                      | As pYG768 but with <i>dinB</i> (F292Y)                                                                                     | This work  |
| pYG768(V7G)                        | As pYG768 but with <i>dinB</i> (V7G)                                                                                       | This work  |
| pBAD18( <i>dinB</i> <sup>+</sup> ) | <i>dinB</i> <sup>+</sup> under the <i>ara</i> promoter inserted with KpnI and XbaI restriction sites into pBAD18 (11)      | This work  |
| pBAD18( <i>dinB</i> (D103N))       | As pBAD18( <i>dinB</i> <sup>+</sup> ) but with <i>dinB</i> (D103N)                                                         | This work  |
| pBAD18( <i>dinB</i> (F292Y))       | As pBAD18( <i>dinB</i> <sup>+</sup> ) but with <i>dinB</i> (F292Y)                                                         | This work  |
| pBAD18( <i>dinB</i> (V7G))         | As pBAD18( <i>dinB</i> <sup>+</sup> ) but with <i>dinB</i> (V7G)                                                           | This work  |
| pET11T( <i>dinB</i> <sup>+</sup> ) | pET11T (12) overexpression vector with untagged <i>dinB</i> <sup>+</sup>                                                   | (13)       |
| pET11T( <i>dinB</i> (D103N))       | As pET11T( <i>dinB</i> <sup>+</sup> ) but with <i>dinB</i> (D103N)                                                         | (7)        |
| pET11T( <i>dinB</i> (F292Y))       | As pET11T( <i>dinB</i> <sup>+</sup> ) but with <i>dinB</i> (F292Y)                                                         | This work  |
| <b>Oligonucleotides</b>            |                                                                                                                            |            |
| D103N mutagenesis forward primer   | GAACCGTTGTCACCTGAATGAGGCTTATC                                                                                              | (2)        |
| D103N mutagenesis reverse primer   | CAGTGACAACGGTTCAATGCGCGAG                                                                                                  | (2)        |

|                                                                                        |                                                 |           |
|----------------------------------------------------------------------------------------|-------------------------------------------------|-----------|
| V288G mutagenesis forward primer                                                       | CTGATTGCTCGCCAGGGGGGGAAATTAAG                   | This work |
| V288G mutagenesis reverse primer                                                       | CCCCTGGCGAGCAATCAGTAAATCAGGTTT                  | This work |
| F292Y mutagenesis forward primer                                                       | CCAGGGGGTCAAATTAAGTACGACGATTTTC                 | This work |
| F292Y mutagenesis reverse primer                                                       | ACTTTAATTTACCCCCCTGGCGAGCAATCAG                 | This work |
| V7G mutagenesis forward primer                                                         | GCGTAAAATCATTCATGGGGATATGGAC                    | This work |
| V7G mutagenesis reverse primer                                                         | CACATGAATGATTTTACGCATTGCTCACCTC                 | This work |
| <i>dinB-KpnI</i> primer for adding <i>KpnI</i> restriction site upstream <i>dinB</i>   | GAGTAAGGTACCGTTGAGAGGTGAGCAATGCG                | This work |
| <i>dinB-XbaI</i> primer for adding <i>XbaI</i> restriction site downstream <i>dinB</i> | GCCTCCTCTAGACATCATAATCCCAGCACCAAGTTG            | This work |
| Undamaged control template for primer extension assay                                  | GCT CGT CAG ACG ATT TAG AGT CTG CAG TG          | (7)       |
| Lesion containing template for primer extension assay                                  | GCTCGTCAGACG/3-deaza-3-methylA/TTTAGAGTCTGCAGTG | (7)       |
| Fluorescently labeled primer for standing start primer extension                       | /HEX/CACTGCAGACTCTAAA                           | (7)       |

---

## REFERENCES

1. **Cairns J, Foster PL.** 1991. Adaptive reversion of a frameshift mutation in *Escherichia coli*. *Genetics* **128**:695-701.
2. **Benson RW, Norton MD, Lin I, Du Comb WS, Godoy VG.** 2011. An active site aromatic triad in *Escherichia coli* DNA Pol IV coordinates cell survival and mutagenesis in different DNA damaging agents. *PLoS One* **6**:e19944.
3. **McKenzie GJ, Lee PL, Lombardo MJ, Hastings PJ, Rosenberg SM.** 2001. SOS mutator DNA polymerase IV functions in adaptive mutation and not adaptive amplification. *Mol Cell* **7**:571-579.
4. **McCool JD, Long E, Petrosino JF, Sandler HA, Rosenberg SM, Sandler SJ.** 2004. Measurement of SOS expression in individual *Escherichia coli* K-12 cells using fluorescence microscopy. *Mol Microbiol* **53**:1343-1357.
5. **Benson RW, Cafarelli TM, Godoy VG.** 2011. SOE-LRed: A simple and time-efficient method to localize genes with point mutations onto the *Escherichia coli* chromosome. *J Microbiol Methods* **84**:479-481.
6. **Blattner FR, Plunkett G, 3rd, Bloch CA, Perna NT, Burland V, Riley M, Collado-Vides J, Glasner JD, Rode CK, Mayhew GF, Gregor J, Davis NW, Kirkpatrick HA, Goeden MA, Rose DJ, Mau B, Shao Y.** 1997. The complete genome sequence of *Escherichia coli* K-12. *Science* **277**:1453-1462.
7. **Cafarelli TM, Rands TJ, Benson RW, Rudnicki PA, Lin I, Godoy VG.** 2013. A single residue unique to DinB-like proteins limits formation of the Pol IV multi-protein complex in *Escherichia coli*. *J Bacteriol.*
8. **Wang RF, Kushner SR.** 1991. Construction of versatile low-copy-number vectors for cloning, sequencing and gene expression in *Escherichia coli*. *Gene* **100**:195-199.
9. **Kim SR, Maenhaut-Michel G, Yamada M, Yamamoto Y, Matsui K, Sofuni T, Nohmi T, Ohmori H.** 1997. Multiple pathways for SOS-induced mutagenesis in *Escherichia coli*: an overexpression of *dinB/dinP* results in strongly enhancing mutagenesis in the absence of any exogenous treatment to damage DNA. *Proc Natl Acad Sci U S A* **94**:13792-13797.
10. **Wagner J, Gruz P, Kim SR, Yamada M, Matsui K, Fuchs RP, Nohmi T.** 1999. The *dinB* gene encodes a novel *E. coli* DNA polymerase, DNA pol IV, involved in mutagenesis. *Mol Cell* **4**:281-286.
11. **Guzman LM, Belin D, Carson MJ, Beckwith J.** 1995. Tight regulation, modulation, and high-level expression by vectors containing the arabinose PBAD promoter. *J Bacteriol* **177**:4121-4130.
12. **Nguyen LH, Jensen DB, Burgess RR.** 1993. Overproduction and purification of sigma 32, the *Escherichia coli* heat shock transcription factor. *Protein Expr Purif* **4**:425-433.
13. **Jarosz DF, Godoy VG, Delaney JC, Essigmann JM, Walker GC.** 2006. A single amino acid governs enhanced activity of DinB DNA polymerases on damaged templates. *Nature* **439**:225-228.

## Supplemental Figure Legends

### Figure S1. The *dnaE915* DinB-mediated survival loss is strain independent.

(A) *dnaE915ΔdinB/pdinB<sup>+</sup>* MG1655 cells are hypersensitive to MMS (7.5 mM). The percent survival is calculated based on the CFU/mL of the untreated cells, which is similar for all strains ( $\sim 1 \times 10^9$  CFU/mL). Error bars represent the standard deviation of the mean from the analysis of at least 3 independent isolates. (B) Synthetic sick phenotypes are also observed in the MG1655 strain. Comparison of representative  $\Delta dinB dnaE915$  colonies with pVector or *pdinB(D103N)* (magnification 40X) or DAPI (live) and propidium iodide (dead) staining of cells from the respective colonies (1000X).

### Figure S2. The *dnaE915* DinB-mediated survival loss is independent of *sulA*.

(A)  $\Delta sulA dnaE915 \Delta dinB / pdinB^+$  cells are hypersensitive to MMS (7.5 mM). The percent survival is calculated based on the CFU/mL of the untreated cells, which is similar for all strains ( $\sim 1 \times 10^9$  CFU/mL). Error bars represent the standard deviation of the mean from the analysis of at least 3 independent isolates. (B) Cultures started from  $\Delta sulA dnaE915 \Delta dinB / pdinB(D103N)$  colonies do not reach saturation after 24 hrs in LB rich medium. There is a large variation in saturation of these cultures compared to the isogenic *sulA<sup>+</sup>* strain. Perhaps suppressors are acquired quicker in this strain. (C) Representative colony sections and microscopy of cells from the  $\Delta sulA dnaE915 \Delta dinB$  strain with the vector or *pdinB(D103N)*. In  $\Delta sulA dnaE915 \Delta dinB / pdinB(D103N)$  colonies have an altered morphology and the cells are elongated, with fewer survivors and increased SOS induction when compared to cells carrying the vector. All strains carry a green fluorescent protein as a reporter of SOS induction (Pr-*sulA*-GFP). The quantification shown below each micrograph is from the count of at least 500 cells from different fields of at least 3 independent colonies at 1000X.

### Figure S3. DinB(D103N) dependent synthetic sickness, but not DinB-dependent survival loss upon MMS treatment, occurs in absence of SOS induction.

(A) DinB dependent MMS hypersensitivity is abolished in SOS deficient cells. The percent survival is calculated based on the CFU/mL of the untreated cells, which is similar for all strains ( $\sim 1 \times 10^9$  CFU/mL). Error bars represent the standard deviation of the mean from the analysis of at least 3 independent isolates. (B) Colonies formed by *dnaE915ΔdinB/pdinB(D103N)* that are unable to induce the SOS network due to  $\Delta recA$  or *lexA3* alleles have altered morphology and contain fewer cells. Representative sections of colonies of SOS deficient *dnaE915ΔdinB* with pVector (normal morphology) or *pdinB(D103N)* (synthetically sick) at 40X. (C) Saturated cultures of SOS deficient *dnaE915ΔdinB pdinB(D103N)* colonies grown in LB rich medium have  $\sim 10$  fold less CFUs than isogenic strains carrying the vector. (D) SOS induction of cells within colonies was determined using FACS.  $\Delta recA$  and *lexA3* alleles abolish SOS induction in *dnaE915ΔdinB/pdinB(D103N)* cells. All strains carry a Pr-*sulA*-GFP construct to detect SOS induction. Cells with fluorescence (FITC-A)  $> 10^2$

are considered to have SOS induction. The data shown is from the analyses of 10,000 cells from 3 independent colonies of each strain.

**Figure S4. The  $\beta$ -processivity clamp binding motif on DinB is required to observe survival loss in the *dnaE915* strain.** (A) Cultures started from *dnaE915* $\Delta$ *dinB*/*pdinB*(*D103N*) $\Delta$  $\beta$  colonies reach saturation after 24 hrs in LB broth just as cells carrying the vector. Error bars represent the standard deviation of the mean from the analysis of at least 5 independent isolates. (B) Representative colony sections and fields of view of cells from *dnaE915* $\Delta$ *dinB* strain with *pdinB*(*D103N*) $\Delta$  $\beta$ . *dnaE915* $\Delta$ *dinB*/*pdinB*(*D103N*) $\Delta$  $\beta$  has similar colony morphology, cell size, and fraction of dead cells as cells carrying the vector. The quantification is from the count of at least 500 cells from different fields and independent isolates at 1000X.

**Figure S5. Genetic interactions between *dnaE915* and the catalytically inactive *pdinB*(*D103N*) inhibit colony formation on minimal medium.**  $\Delta$ *dinB**dnaE915*/*pdinB*(*D103N*) is unable to form colonies on M9 glucose minimal medium, with or without casamino acid supplementation. This phenotype is independent of *sulA*. Deletion of *recA* or the  $\beta$ -clamp binding motif of *dinB*(*D103N*) allows for the formation of colonies on minimal medium. Representative plates are shown.

**Figure S6. Strong selective pressure against antagonistic genetic interactions between *dnaE915* and plasmid borne *dinB* alleles allows for suppressor isolation.** (A) The inability of the synthetic sick *dnaE915* $\Delta$ *dinB*/*pdinB*(*D103N*) strain to reach saturation in LB medium after 24 hrs subsides upon subculturing. (B) *dnaE915* $\Delta$ *dinB* *pdinB*<sup>+</sup> cultures started from colonies coming from MMS-hypersensitive cultures (7.5mM) are no longer MMS hypersensitive upon re-treatment with MMS (7.5 mM; gray bars) or NFZ (7.5  $\mu$ M; white bars). “*pdinB* truncation” refers to a plasmid with an out of frame *dinB* gene deletion, between basepairs 353-366, which encodes a 151 amino acid truncated protein. The percent survival is calculated based on the CFU/mL of the untreated cells, which is similar for all strains ( $\sim 1 \times 10^9$  CFU/mL). The mutations were identified as intragenic or extragenic after DNA sequencing. Error bars represent the standard deviation of the mean from the analysis of at least 3 independent isolates.

**Figure S7. Mutations suppress DinB-mediated growth defects in  $\Delta$ *dinB**dnaE915*.** (A) Cultures of  $\Delta$ *dinB**dnaE915* with plasmid borne wild-type *dinB*<sup>+</sup>, *dinB*(*F292Y*), *dinB*(*V7G*), or *dinB*(*V288G*) were treated with DNA damaging agents (NFZ (7.5  $\mu$ M: white bars) or MMS (7.5 mM: gray bars)) to identify suppression of MMS dependent survival loss. The percent survival is calculated based on the CFU/mL of the untreated cells, which is similar for all strains ( $\sim 1 \times 10^9$  CFU/mL). Error bars represent the standard deviation of the mean from the analysis of at least 3 independent isolates. (B) *F292Y*, *V7G*, or *V288G* amino acid substitutions suppress *dinB*(*D103N*) synthetic sickness in

untreated  $\Delta$ *dinBdnaE915* cells. Representative  $\Delta$ *dinBdnaE915* colonies carrying the indicated plasmids at 40X magnification.

**Figure S8. The DinB(F292Y) variant maintains a structure similar to that of wild-type DinB.** (A) Circular dichroism (CD) reveals that the secondary structure of DinB(F292Y) is similar to that of wild-type DinB. (B) The secondary structure composition of DinB(F292Y) is similar to DinB.  $\alpha$ R=Fraction of regular alpha helices,  $\alpha$ D=Fraction of disordered alpha helices,  $\beta$ R=Fraction of regular beta sheets,  $\beta$ D=Fraction of disordered beta sheets, T=Fraction of turns, U= Fraction of undefined or unstructured elements.

Figure S1

MG1655 *dnaE915ΔdinB*

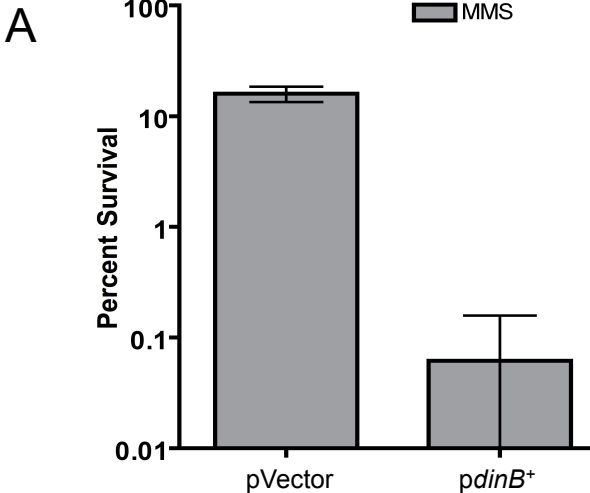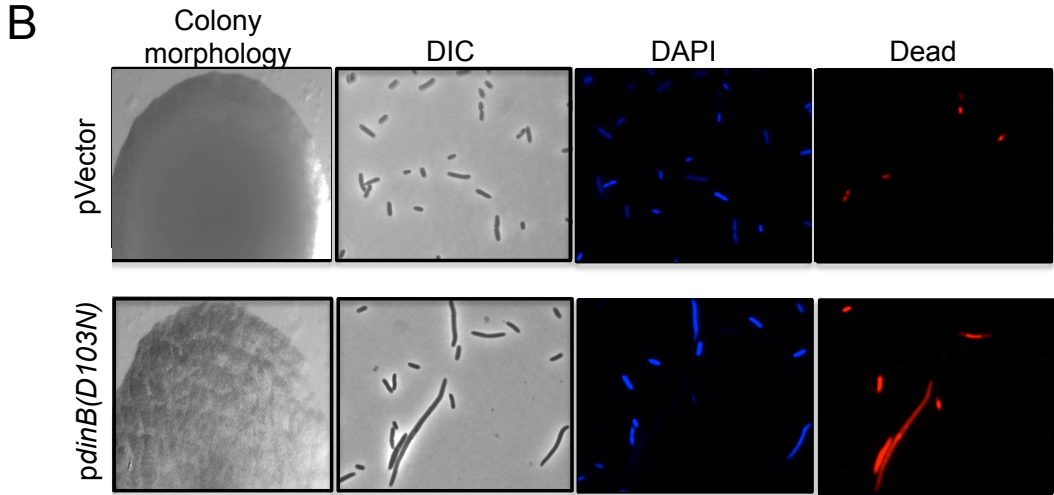

# Figure S2

**A**  $\Delta sulAdnaE915\Delta dinB$

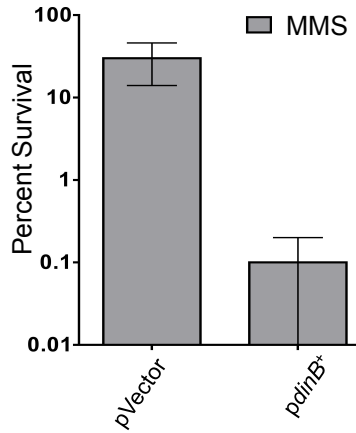

**B** Overnight cultures *dnaE915ΔdinB*

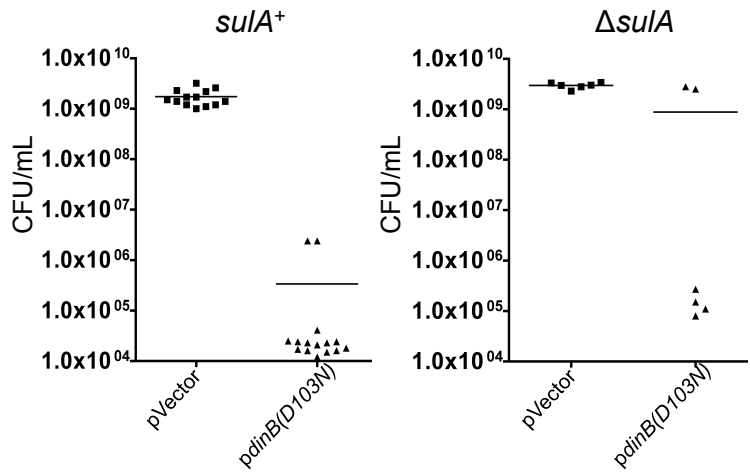

$\Delta sulAdnaE915\Delta dinB$

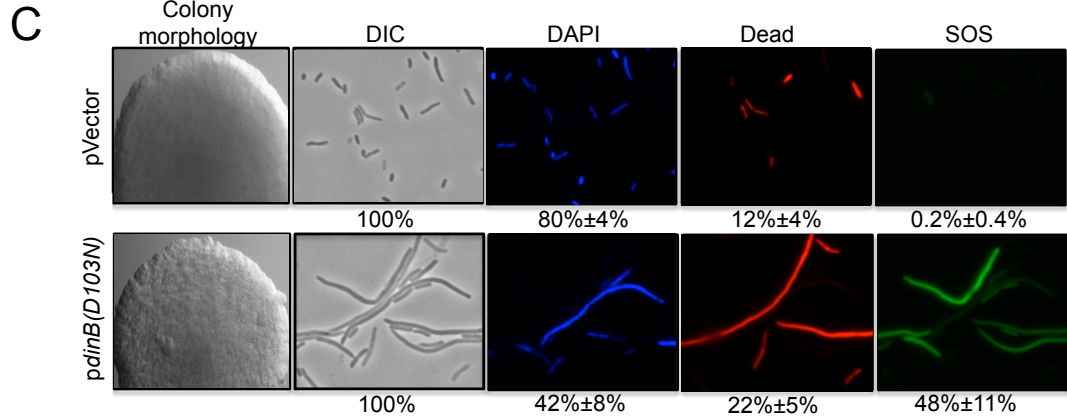



# Figure S3

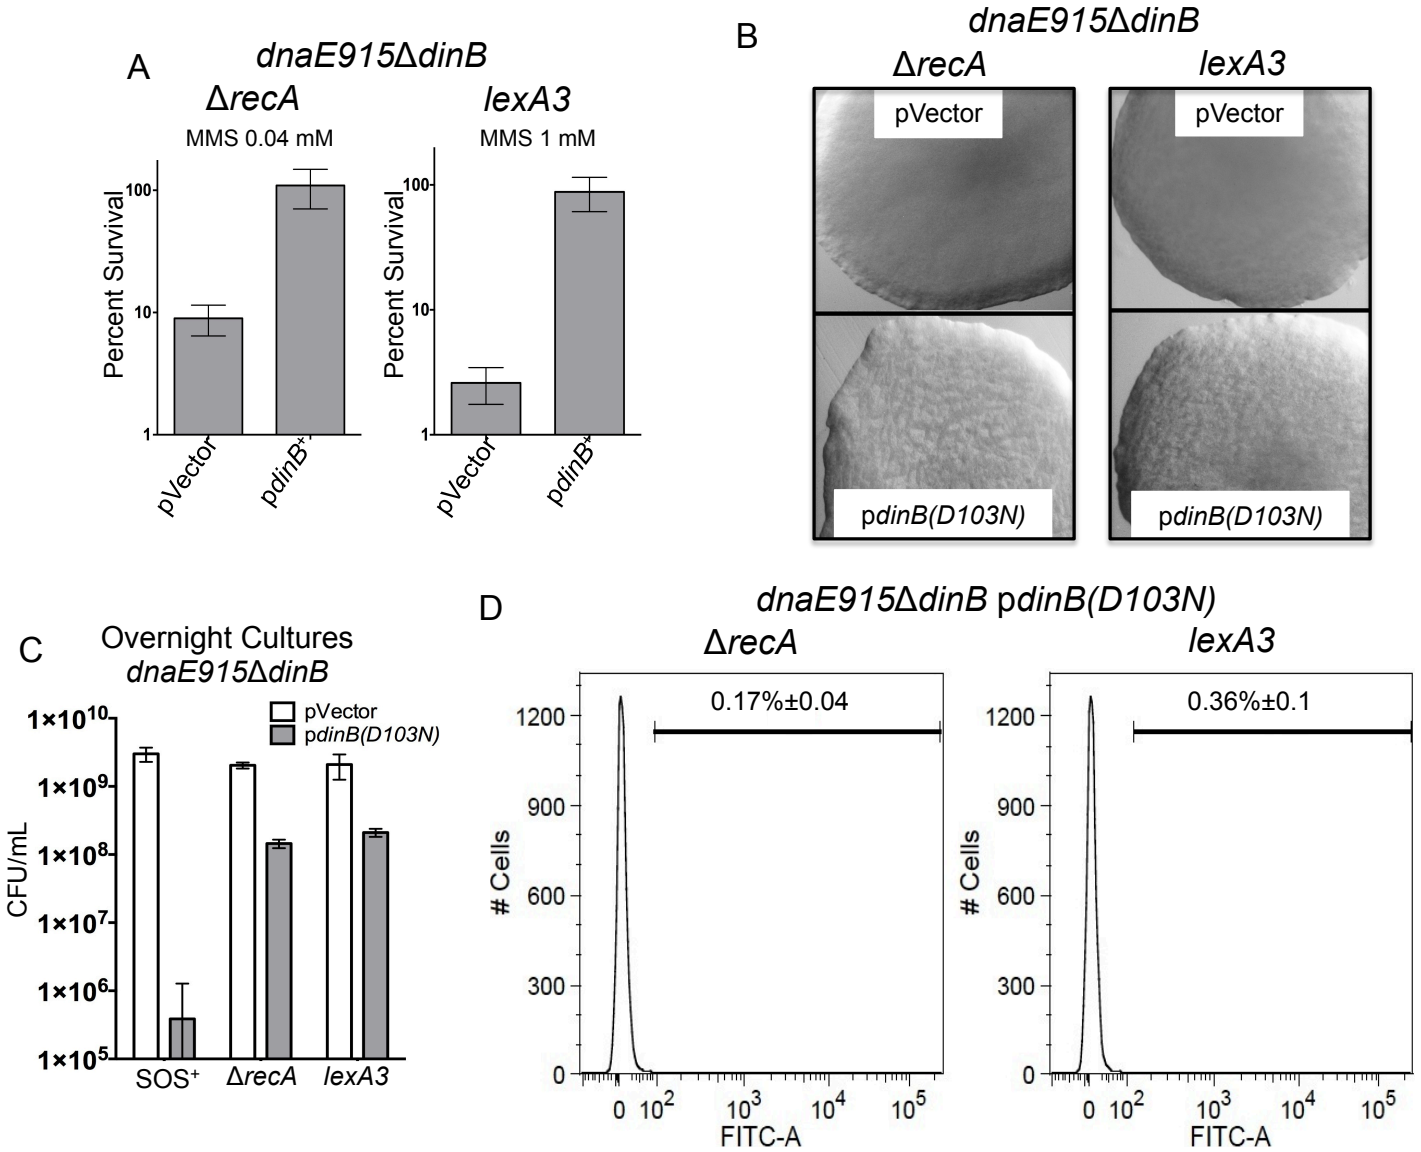

Figure S4

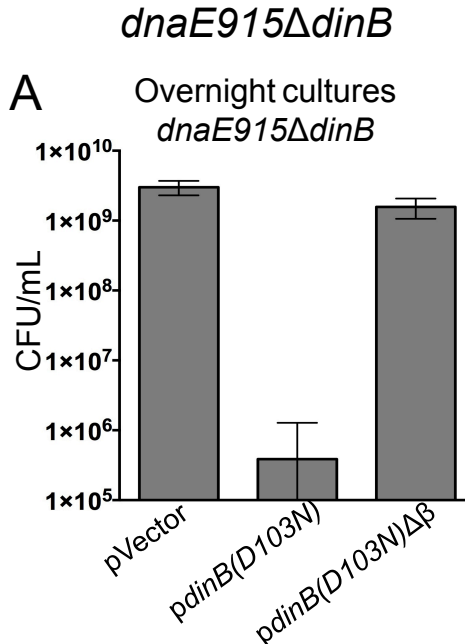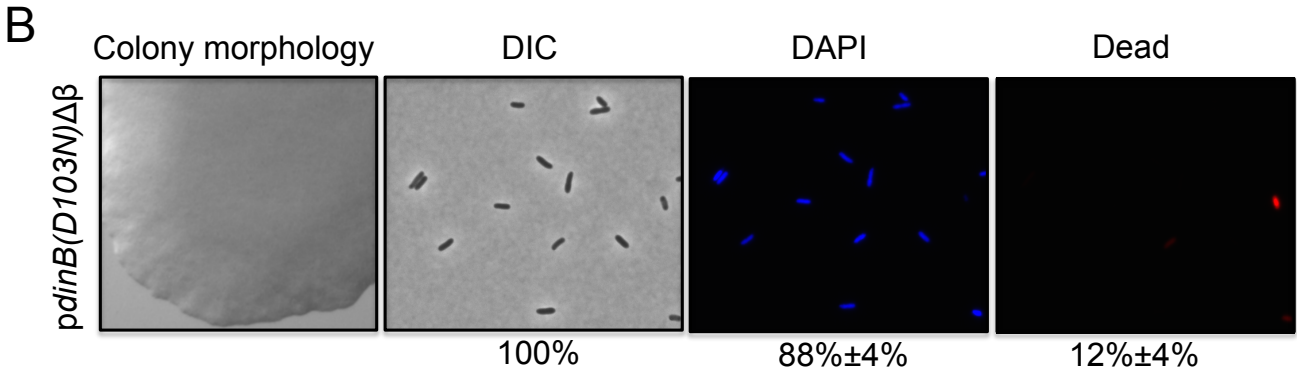

Figure S5

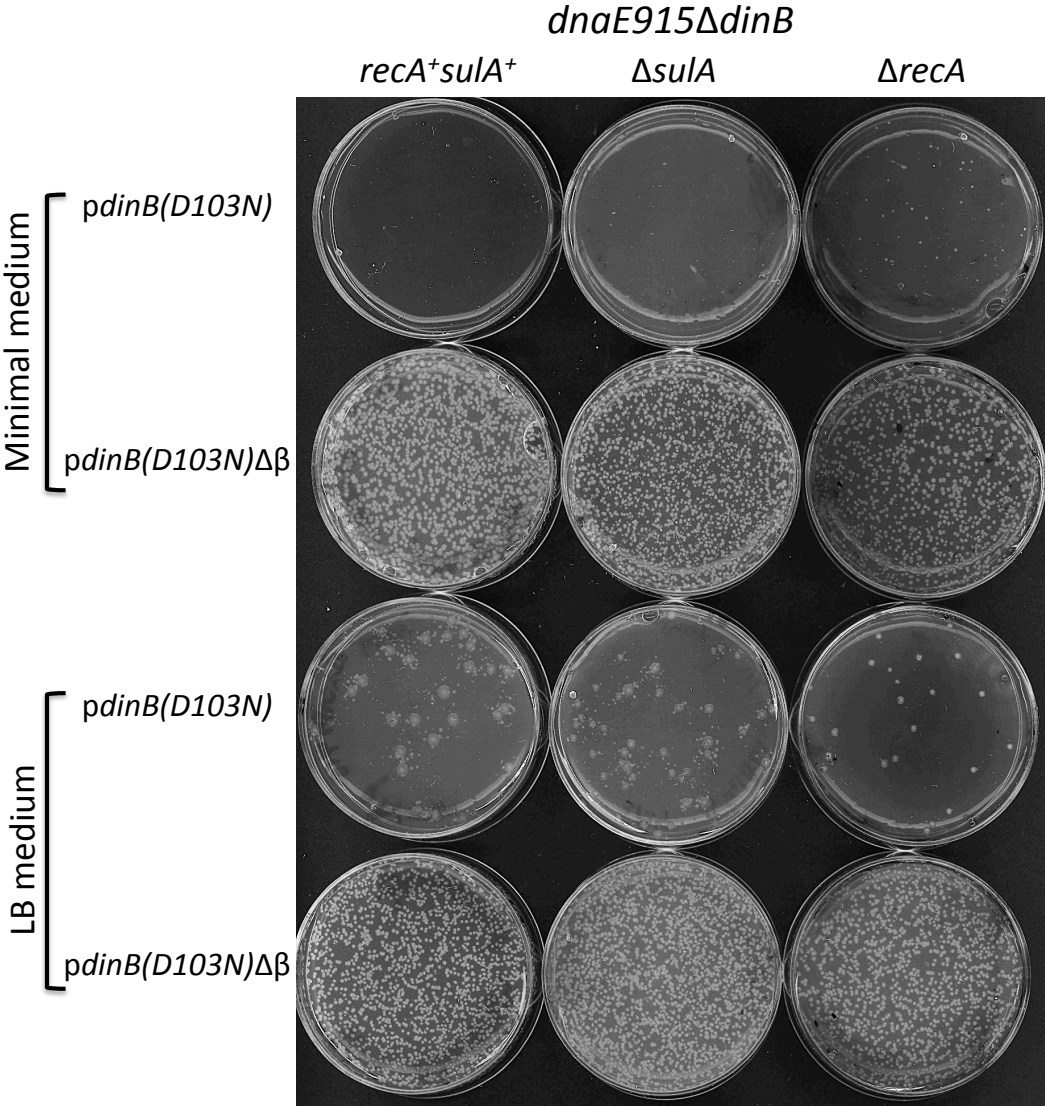

# Figure S6

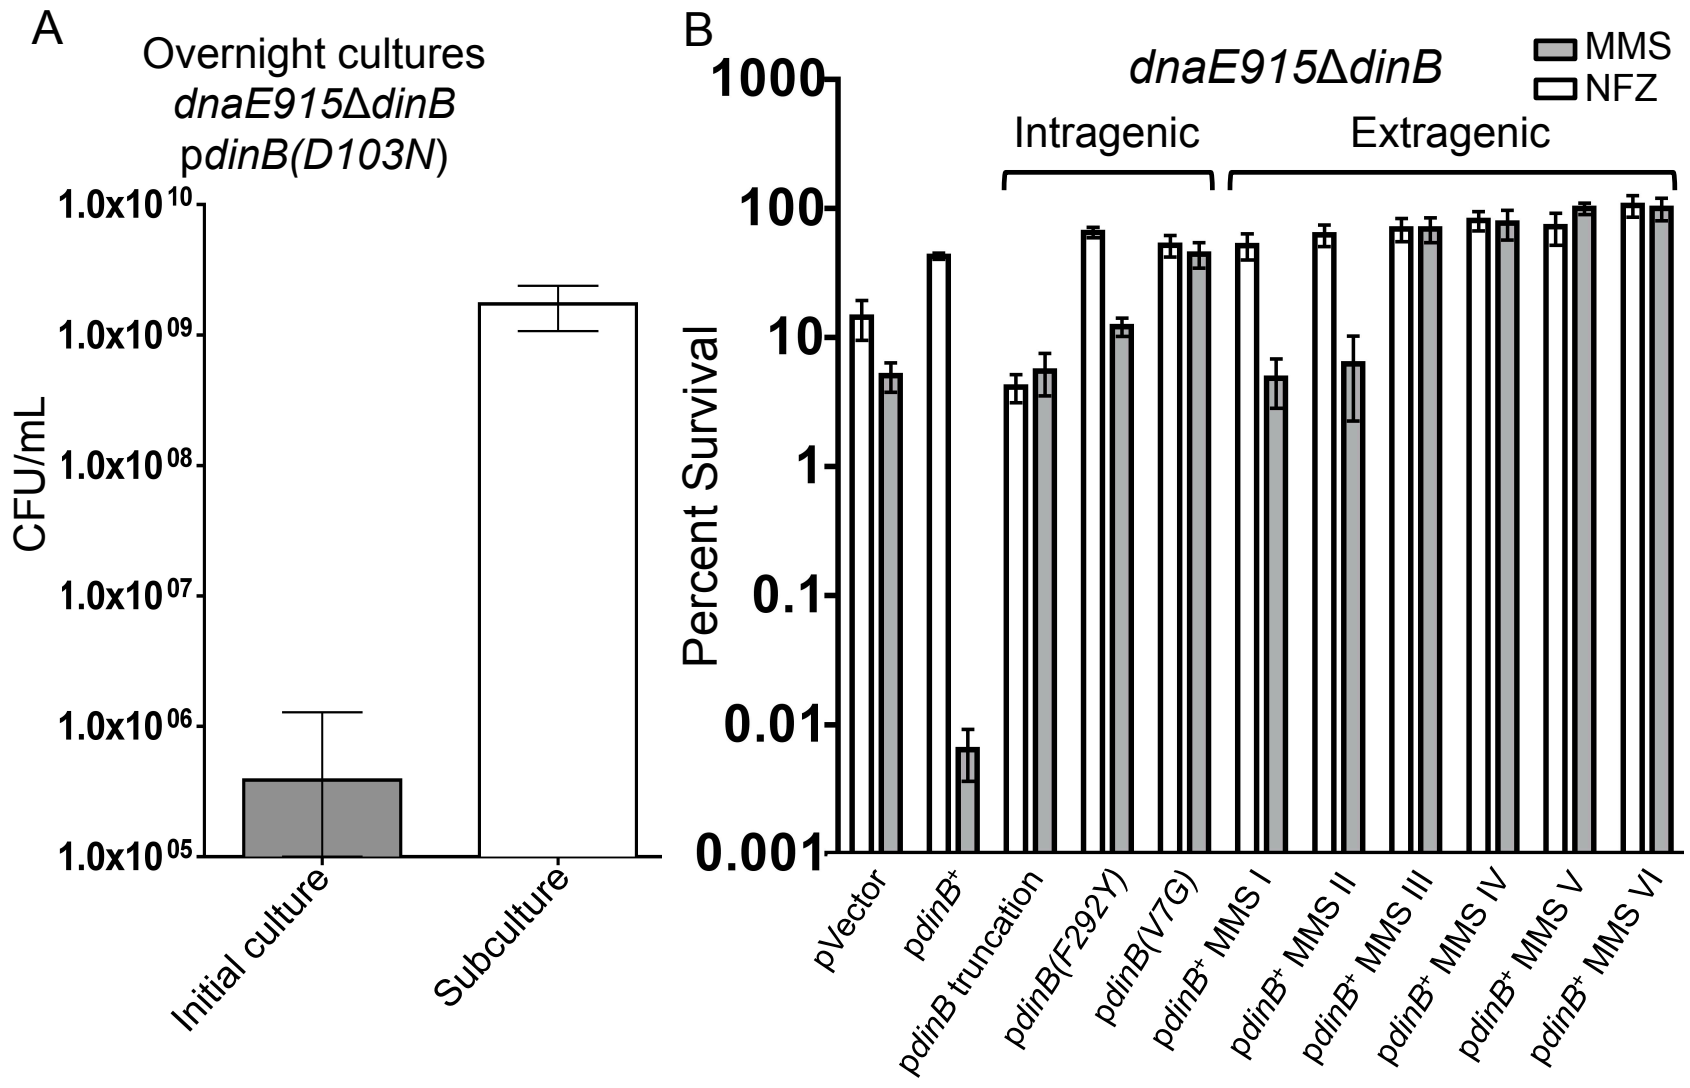

Figure S7

A

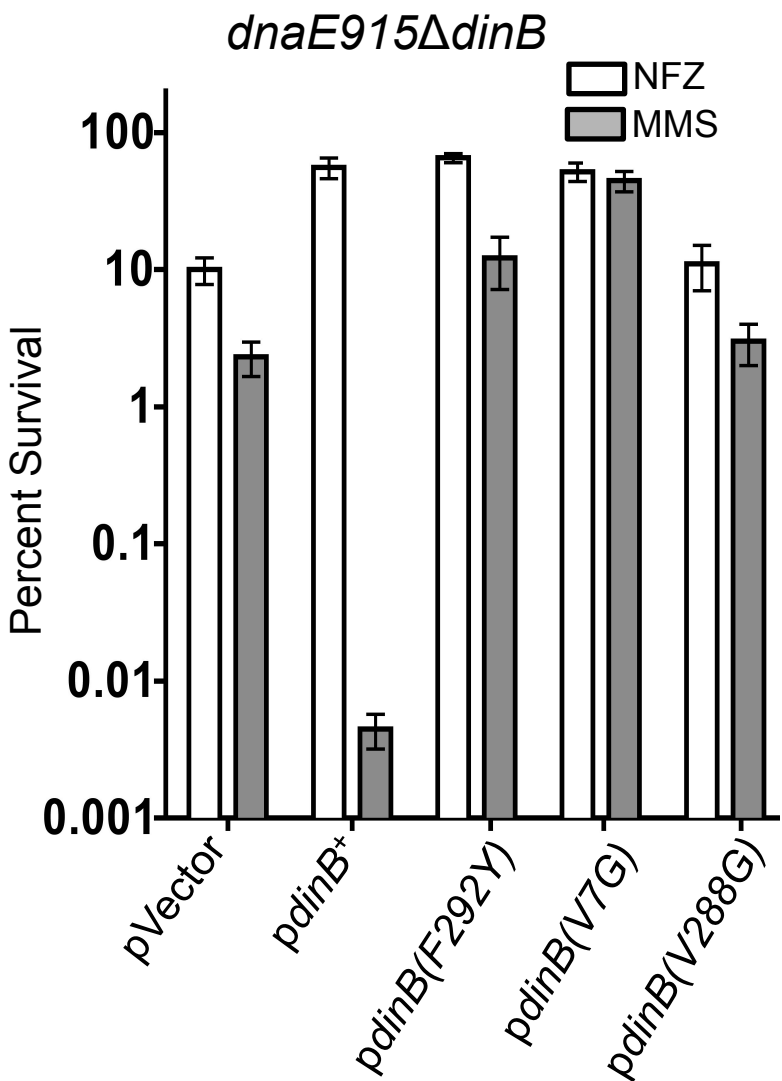

B

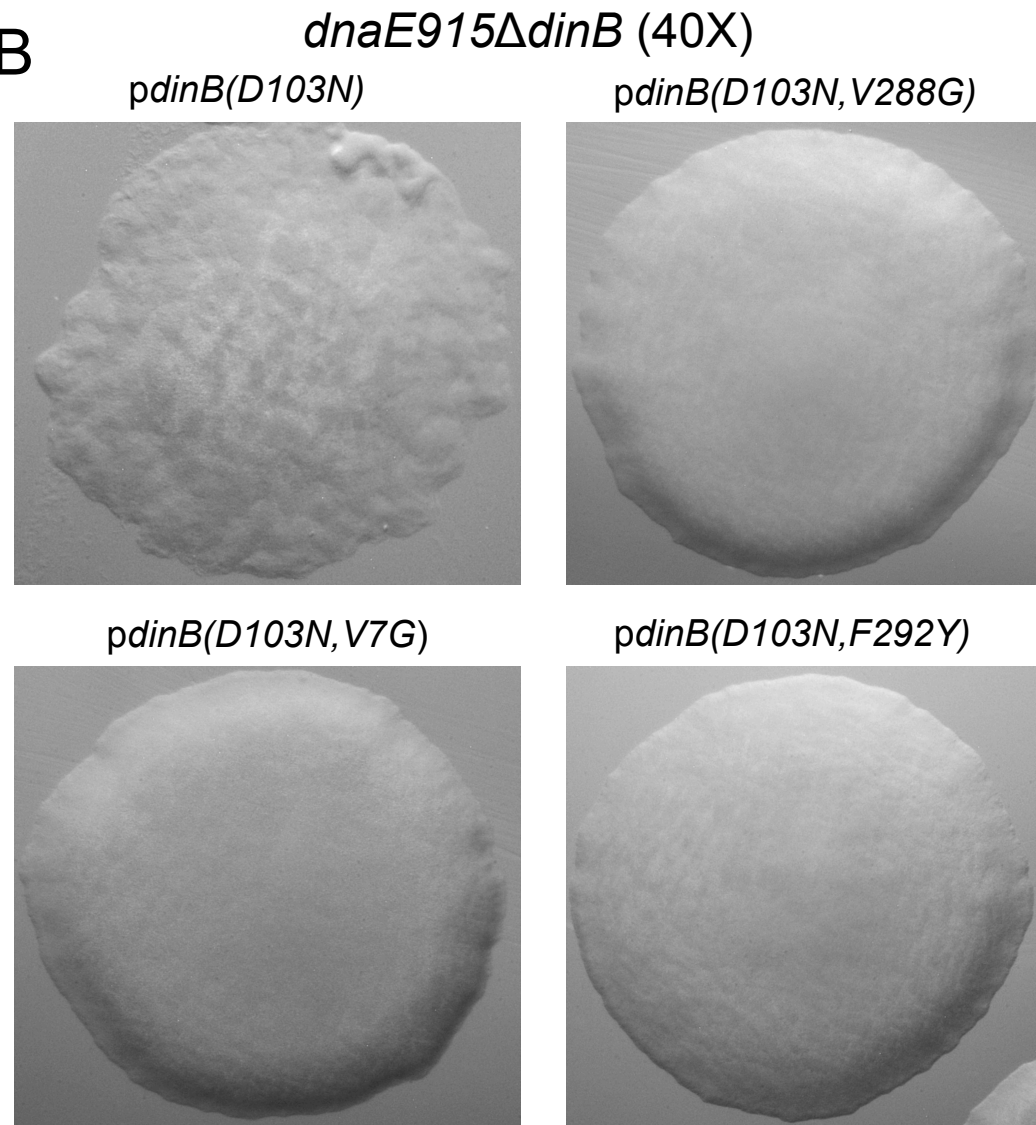

Figure S8

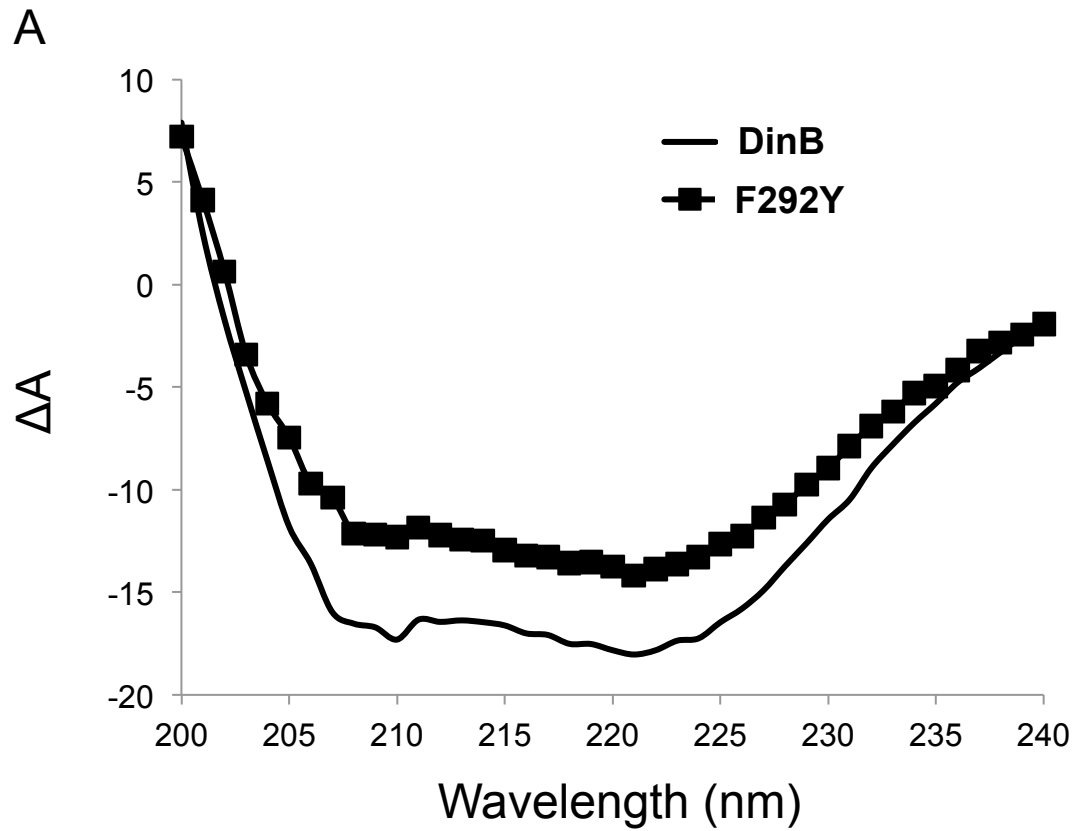

B

|                    | $\alpha R$ | $\alpha D$ | $\beta R$ | $\beta D$ | T     | U     |
|--------------------|------------|------------|-----------|-----------|-------|-------|
| <b>DinB</b>        | 0.796      | 0.192      | 0         | 0         | 0     | 0.012 |
| <b>DinB(F292Y)</b> | 0.727      | 0.248      | 0         | 0         | 0.001 | 0.024 |
